# Supplementary material for: Spherical Body Protein 2 truncated copy 11 as a specific Babesia bovis attenuation marker
Source: PubMed Central journal article supplement (PMC5848574; doi:10.1186/s13071-018-2782-z), 2018-03-12

*sbp2t7* Nucleotide Alignment in Texas and Australian *Babesia bovis* strains

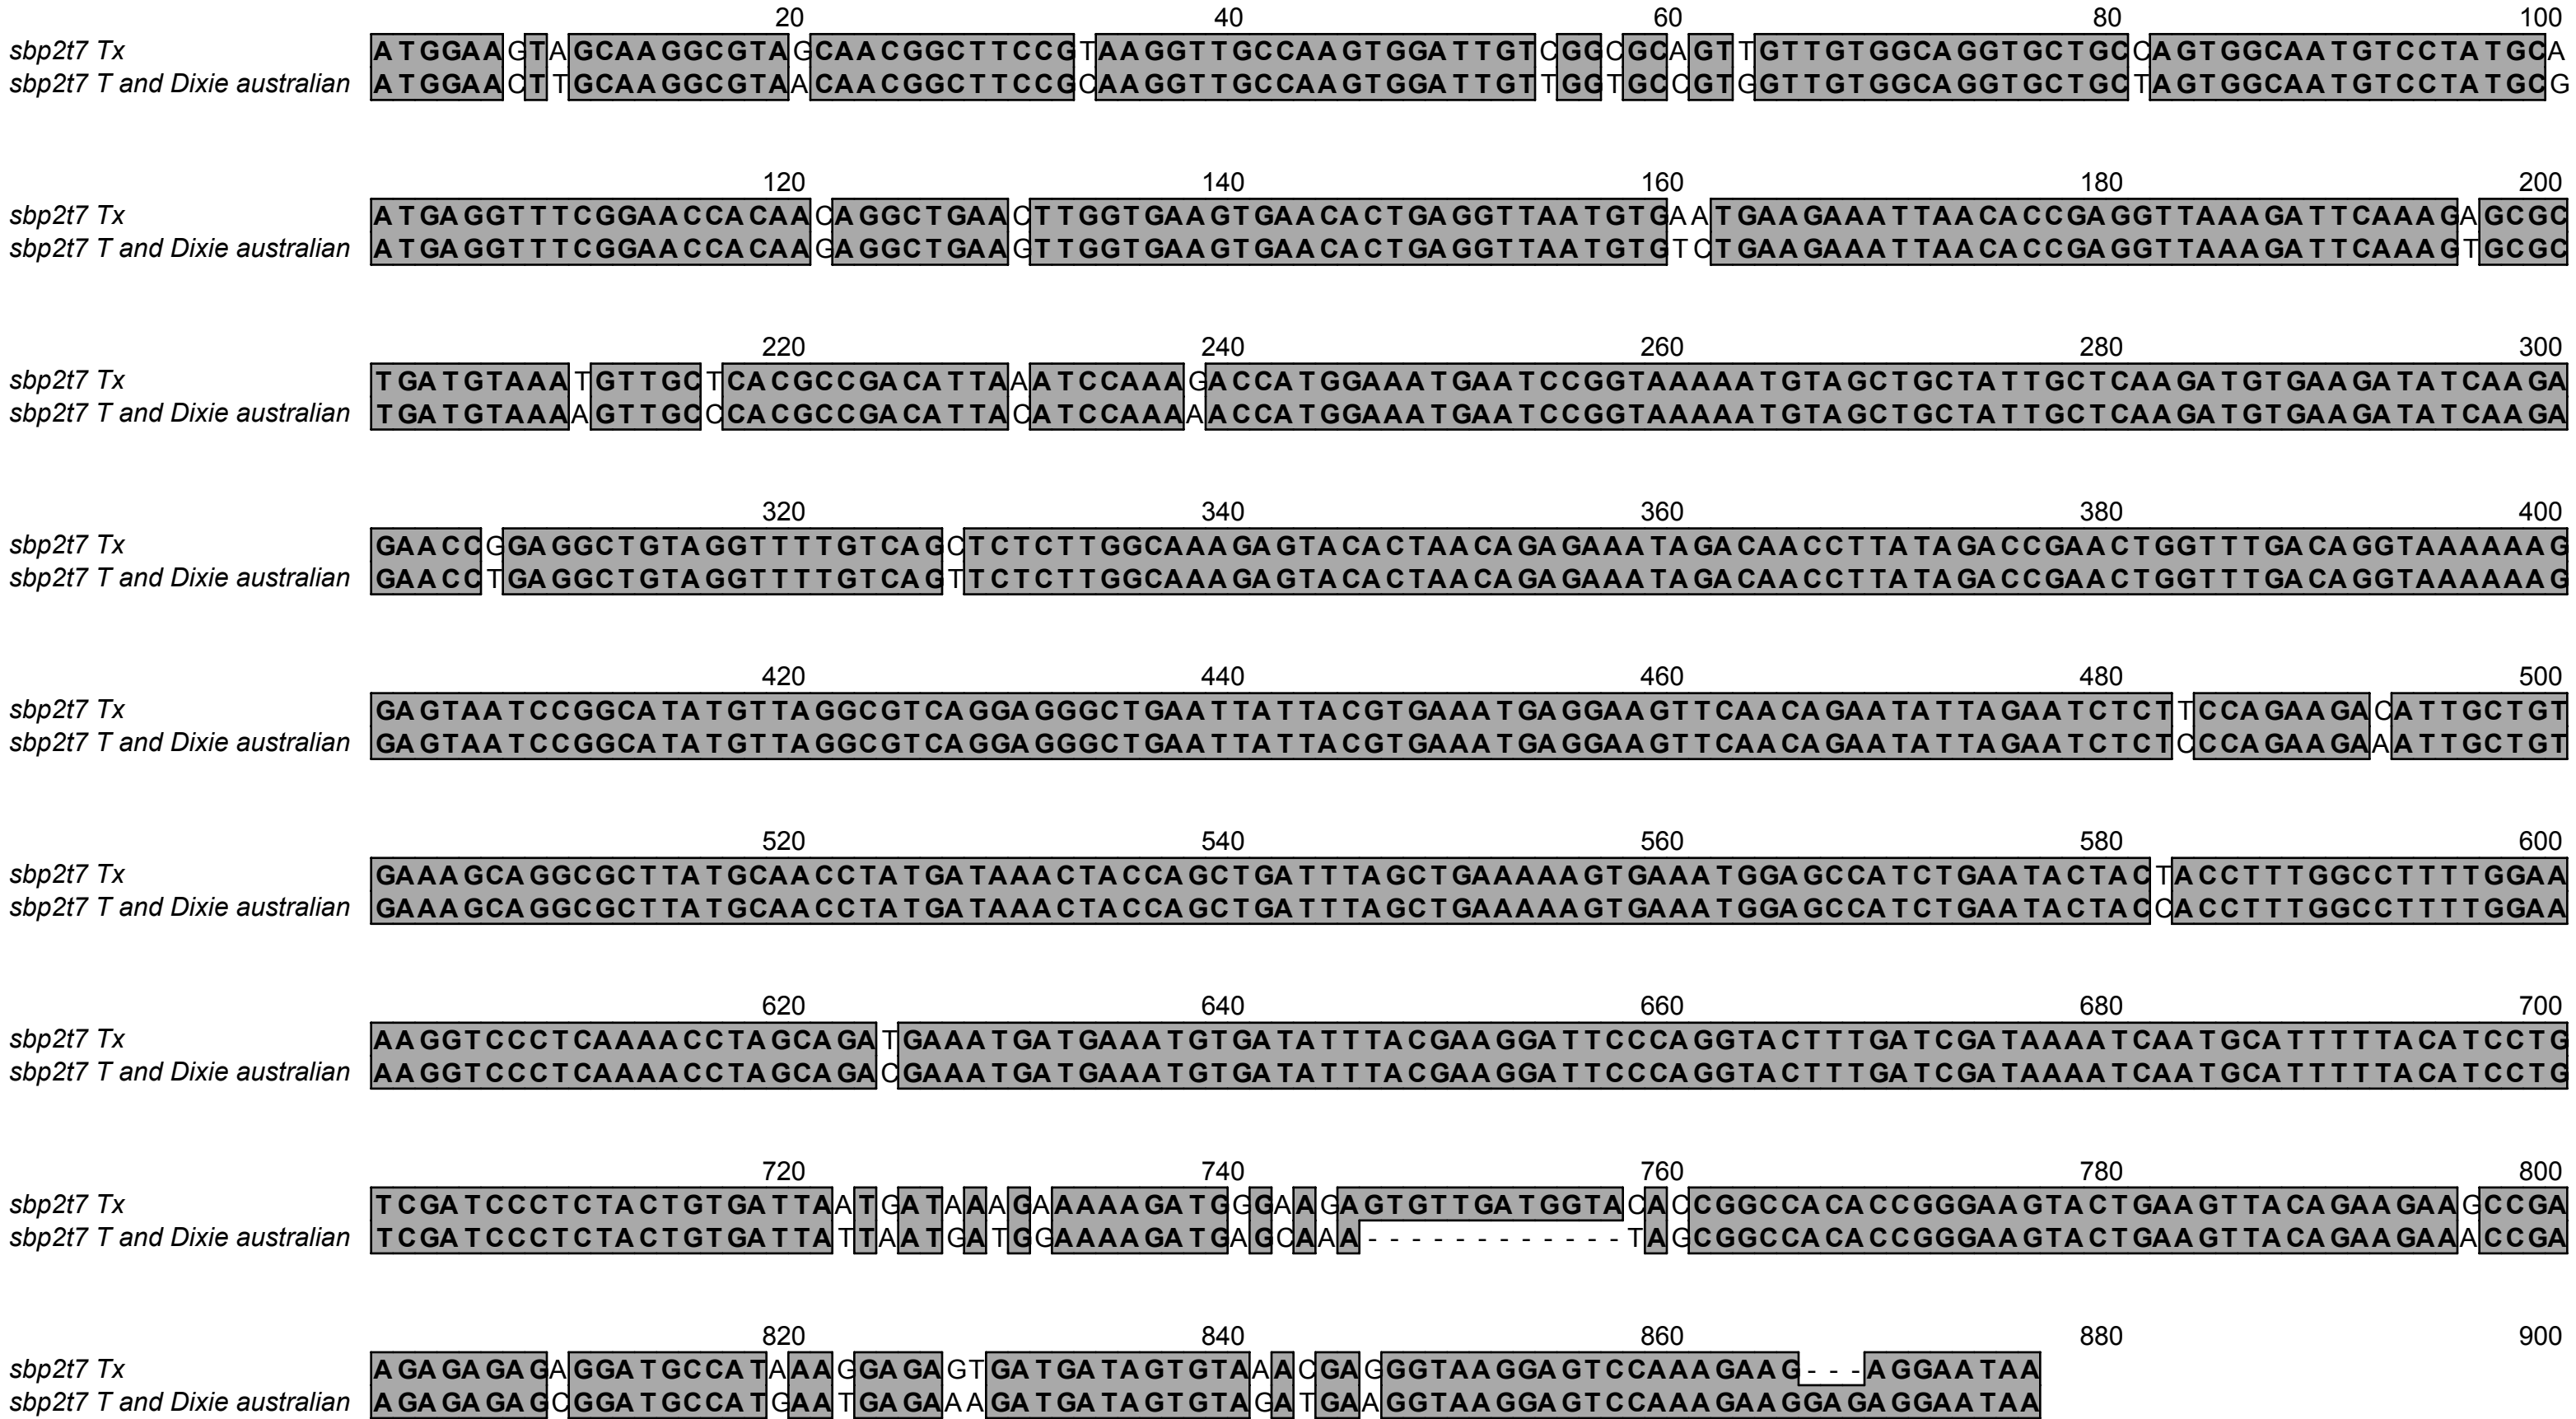

Supplement: 13071_2018_2782_MOESM2_ESM.pdf [file 13071_2018_2782_MOESM2_ESM.pdf]
