# Supplementary material for: Spherical Body Protein 2 truncated copy 11 as a specific Babesia bovis attenuation marker
Source: PubMed Central journal article supplement (PMC5848574; doi:10.1186/s13071-018-2782-z), 2018-03-12
Supplement: 13071_2018_2782_MOESM5_ESM.pdf [file 13071_2018_2782_MOESM5_ESM.pdf]

SBP21 SBP211 SBP212 ... MAIVTARRNNGFRKVAKWIVGAVVVAASASSANVVG... YELMSDDHTFFARPG... YD I

Number of Aminoacids

SBP2 KPVAEVDQCAA 2248
SBP21 283
SBP212 298
SBP213 243
SBP214 250
SBP215 430
SBP216 267
SBP217 291
SBP218 286
SBP219 292
SBP2110 237
SBP2111 272
SBP2112 389
